# Supplementary material
Source: PubMed Central journal article supplement (PMC3353415)

Compact bone 1 mask

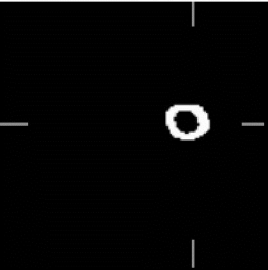

Transaxial

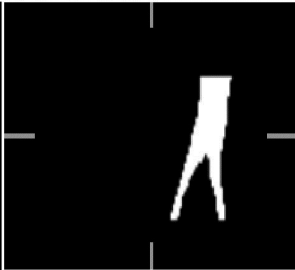

Sagittal

Cancellous bone 1 mask

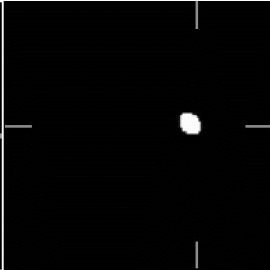

Transaxial

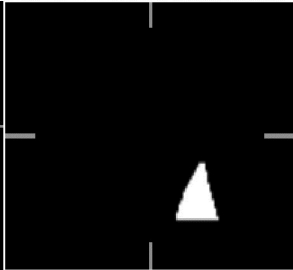

Sagittal

Supplement: NIHMS375342-supplement.pdf [file NIHMS375342-supplement.pdf]
